# Supplementary material for: Long Non-coding RNA H19 Inhibits Adipocyte Differentiation of Bone Marrow Mesenchymal Stem Cells through Epigenetic Modulation of Histone Deacetylases
Source: PubMed Central journal article supplement (PMC4924093; doi:10.1038/srep28897), 2016-06-28
Supplement: srep28897-s1.pdf [file srep28897-s1.pdf]

**Long Non-coding RNA *H19* Inhibits Adipocyte Differentiation of Bone Marrow Mesenchymal Stem Cells through Epigenetic Modulation of Histone Deacetylases**

Yiping Huang<sup>1</sup>, Yunfei Zheng<sup>1</sup>, Chanyuan Jin<sup>2</sup>, Xiaobei Li<sup>1</sup>, Lingfei Jia<sup>1,3\*</sup>, Weiran Li<sup>1,4\*</sup>

<sup>1</sup>Department of Orthodontics, Peking University School and Hospital of Stomatology, Beijing 100081, China.

<sup>2</sup>Department of Prosthodontics, Peking University School and Hospital of Stomatology, Beijing 100081, China.

<sup>3</sup>Central Laboratory, Peking University School and Hospital of Stomatology, Beijing 100081, China.

<sup>4</sup>National Engineering Laboratory for Digital and Material Technology of Stomatology, Beijing Key Laboratory of Digital Stomatology, Beijing 100081, China

## Supplementary Information

Supplementary Figure S1. *H19* and *miR-675* expression in BMSCs transfected with lentiviruses. (A) Percentage of nuclear and cytoplasmic RNA levels of *H19*, *MALAT1*, and *GAPDH* measured by qRT-PCR after subcellular fractionation in BMSCs. (B) Left: relative expression of *H19*, as determined by qRT-PCR analysis, in BMSCs transfected with *H19* and the vacant vector (NC). Middle: relative expression of *H19* in BMSCs transfected with sh*H19* and the non-targeting vector (shNC). Right: relative expression of *miR-675* in BMSCs transfected with *miR-675*, anti-*miR-675*, or the scrambled vector (miR-NC). Data are shown as mean  $\pm$  SD (\*\* $P < 0.01$ ).

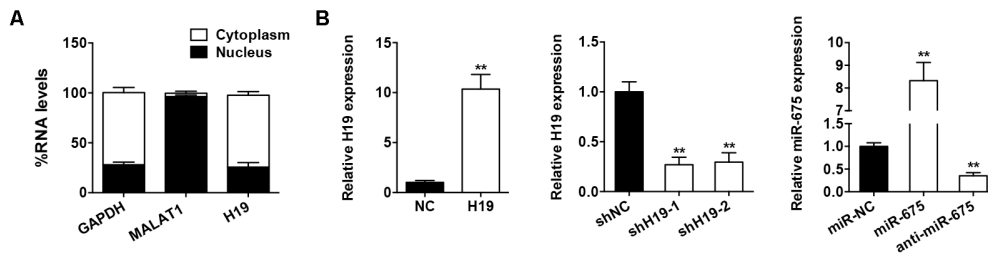

Supplementary Figure S2. Relative mRNA expression of *HDACs 4-6* in BMSCs treated with or without TSA (400 nM). Results are presented as mean  $\pm$  SD.

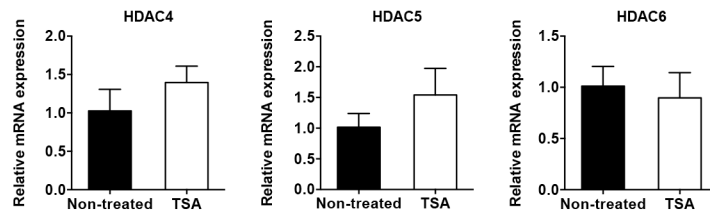

**Supplementary Table S1.** The miR-675 potential target sites in HDAC4 transcript according to the RNA22 software

| miRNA              | leftmost<br>position of<br>predicted<br>targeted<br>site | cDNA<br>region | folding<br>energy (in<br>-Kcal/mol) | predicted target site           | base pairs in<br>putative<br>heteroduplex | span of<br>target | p-value      |
|--------------------|----------------------------------------------------------|----------------|-------------------------------------|---------------------------------|-------------------------------------------|-------------------|--------------|
| <b>has-miR-675</b> | <b>4183</b>                                              | <b>3'UTR</b>   | <b>-22.4</b>                        | <b>CACGGGAAGCCTTTCTGCCGCCCA</b> | <b>19</b>                                 | <b>24</b>         | <b>0.116</b> |
| has-miR-675        | 6166                                                     | 3'UTR          | -16.8                               | CCACTTGGGTTTTTCCACTGCAGCCA      | 16                                        | 26                | 0.0919       |
| has-miR-675        | 6231                                                     | 3'UTR          | -17.9                               | AACCCAGGGACCCTTGTTGCCTG         | 14                                        | 23                | 0.186        |
| has-miR-675        | 6602                                                     | 3'UTR          | -12.4                               | GGTCTTGGGACTTGTTTGACTT          | 14                                        | 22                | 0.18         |
| has-miR-675        | 6671                                                     | 3'UTR          | -14.7                               | AGGAGCTGGTCCATTCCCCATTC         | 13                                        | 23                | 0.0978       |
| has-miR-675        | 6766                                                     | 3'UTR          | -17.9                               | CTCTGGGGATCCTGCCACCT            | 16                                        | 20                | 0.124        |
| has-miR-675        | 8170                                                     | 3'UTR          | -18.5                               | CGCCGCCCGCCCTCACTGGCCT          | 16                                        | 22                | 0.147        |
| has-miR-675        | 7360                                                     | 3'UTR          | -23.4                               | CGCTGGGACTGGCCGCCCC             | 15                                        | 19                | 0.261        |

The bold item indicates the predicted target site of maximum likelihood

**Supplementary Table S2.** The miR-675 potential target sites in HDAC5 transcript according to the RNA22 software

| miRNA              | leftmost<br>position of<br>predicted<br>targeted<br>site | cDNA<br>region | folding<br>energy (in<br>-Kcal/mol) | predicted target site          | base pairs in<br>putative<br>heteroduplex | span of<br>target | p-value      |
|--------------------|----------------------------------------------------------|----------------|-------------------------------------|--------------------------------|-------------------------------------------|-------------------|--------------|
| <b>has-miR-675</b> | <b>4443</b>                                              | <b>3'UTR</b>   | <b>-19.1</b>                        | <b>AGAACCAGGTCTGCTCCCCACCT</b> | <b>13</b>                                 | <b>23</b>         | <b>0.261</b> |
| has-miR-675        | 3925                                                     | 3'UTR          | -12.3                               | GTCCCTCCCCCATTTCCTGCATTC       | 13                                        | 26                | 0.023        |
| has-miR-675        | 5208                                                     | 3'UTR          | -13.7                               | TCATGTAAACCCACTCCTTGCTT        | 14                                        | 23                | 0.221        |
| has-miR-675        | 5162                                                     | 3'UTR          | -17.8                               | GGCTCCCGGCCCTTACCCACTC         | 16                                        | 23                | 0.127        |
| has-miR-675        | 4210                                                     | 3'UTR          | -14.7                               | TTCCCTTCTTTCGTCCTCACCA         | 13                                        | 24                | 0.00691      |

The bold item indicates the predicted target site of maximum likelihood

**Supplementary Table S3.** The miR-675 potential target sites in HDAC6 transcript according to the RNA22 software

| miRNA              | leftmost<br>position of<br>predicted<br>targeted<br>site | cDNA<br>region | folding<br>energy (in<br>-Kcal/mol) | predicted target site         | base pairs in<br>putative<br>heteroduplex | span of<br>target | p-value      |
|--------------------|----------------------------------------------------------|----------------|-------------------------------------|-------------------------------|-------------------------------------------|-------------------|--------------|
| <b>has-miR-675</b> | <b>3832</b>                                              | <b>3'UTR</b>   | <b>-19.1</b>                        | <b>AGAATACGGTCCCTCTTCACCT</b> | <b>13</b>                                 | <b>22</b>         | <b>0.127</b> |
| has-miR-675        | 3903                                                     | 3'UTR          | -18.7                               | GATGAGGGGTAGCCTCCCCTGCATCC    | 15                                        | 27                | 0.0179       |

The bold item indicates the predicted target site of maximum likelihood

**Supplementary Table S4.** Sequences of RNA and DNA Oligonucleotides

| Name                       | Sense Strand/Sense Primer (5'-3')                   | Antisense Strand/Antisense Primer (5'-3') |
|----------------------------|-----------------------------------------------------|-------------------------------------------|
| <b>Primers for qRT-PCR</b> |                                                     |                                           |
| H19                        | GCACCTTGGACATCTGGAGT                                | TTCTTTCCAGCCCTAGCTCA                      |
| PPAR $\gamma$              | GCTGTTATGGGTGAAACTCTG                               | ATAAGGTGGAGATGCAGGTTC                     |
| C/EBP $\alpha$             | GCAAGGCCAAGAAGTCGGTGGAC                             | TGCCCATGGCCTTGACCAAGGAG                   |
| FABP4                      | AGCACCATAACCTTAGATGGGG                              | CGTGGAAGTGACGCCTTTCA                      |
| HDAC1                      | CCGCATGACTCATAATTTGC                                | TGGAGCGCAAGAATTTAATG                      |
| HDAC2                      | AATTTGCGCATGTTACCTCA                                | TATCCGCTTGTCTGATGCTC                      |
| HDAC3                      | GATGGCATTGATGACCAGAG                                | GATCACAGCCCAGAGAGTCA                      |
| HDAC4                      | CGTCCCGGTACTTGTATGTG                                | ATTCCACGGAAACGATAGC                       |
| HDAC5                      | TTCTTTGGACCAGAGTTCCC                                | GTTGGGTTCAGAGGCTGTTT                      |
| HDAC6                      | CGGAGGGTCCTTATCGTAGA                                | GTAGCGGTGGATGGAGAAAT                      |
| GAPDH                      | GGTCACCAGGGCTGCTTTTA                                | GGATCTCGCTCCTGGAAGATG                     |
| miR-675 RT primer          | GTCGTATCCAGTGCAGGGTCCGAGGTATTCGCACTGGATACGACCACTGTG |                                           |
| miR-675                    | GTGCTGGTGCGGAGAGG                                   | GTGCAGGGTCCGAGGT                          |

|               |                          |                          |
|---------------|--------------------------|--------------------------|
| U6            | CTCGCTTCGGCAGCACA        | AACGCTTCACGAATTTGCGT     |
| <b>Mimics</b> |                          |                          |
| miR-675 mimic | UGGUGCGGAGAGGGCCACAGUG   | CUGUGGGCCCUCUCCGCACCAUU  |
| mimic NC      | UCACAACCUCCUAGAAAGAGUAGA | UACUCUUUCUAGGAGGUUGUGAUU |
| <b>siRNAs</b> |                          |                          |
| siHDAC4       | CGACAGGCCUCGUGUAUGATT    | UCAUACACGAGGCCUGUCGTT    |
| siHDAC5       | GGACUUCUCUGCACAGCAUTT    | AUGCUGUGCAGAGAAGUCCTT    |
| siHDAC6       | GAGGGUCCUUAUCGUAGAUTT    | AUCUACGAUAAGGACCCUCTT    |
| siNC          | UUCUCCGAACGUGUCACGUTT    | ACGUGACACGUUCGGAGAATT    |

Abbreviations: C/EBP $\alpha$ , CCAAT-enhancer-binding proteins- $\alpha$ ; FABP4, fatty acid binding protein 4; GAPDH, Glyceraldehyde 3-phosphate dehydrogenase; HDAC, histone deacetylases; PPAR $\gamma$ , peroxisome proliferator-activated receptor- $\gamma$ .
